# Supplementary material
Source: Research Square preprint supplement (doi:10.21203/rs.3.rs-10319826/v1)
Supplement: Supplementary file 1 [file 0315b188cd40aadebcc9b583.docx]

**Supplementary material 1.** Primers’ sequences and efficiencies. Primers were found in the literature or designed specifically for this experiment using the NCBI website. All primers tested for IL-6 and IL-17A, B and F proved to be non-specific, and the corresponding PCRs could not be performed.

| **Gene** | **Sequences (3’-5’)** | **Efficiency** |
| --- | --- | --- |
| **TNF-α** | Forward: CAAGGACTCAGATCATCGTCTCA Reverse: CGGCTTTGACATTGGCTACAA | 1,99 |
| **IL-10** (Luo *et al.*, 2015) | Forward: CCATGCCCAGCTCAGCACTG  Reverse: CCATCACTCTCTGCCTTCGG | 1,91 |
| **TLR4** | Forward: TGGAACAGGTATCCCAGAGG  Reverse: CAGAATCCTGAGGGAGTGGA | 1,81 |
| **TLR6** | Forward: TTCACCTGGTCTTTCATCCA  Reverse: GCCCTTGAGTGAGTTCCAAT | 1,89 |
| **NOD2** | Forward: ACGTCGTGATCCGTGAAC  Reverse: GAGCGCATCCTCTTAACTTTC | 2,00 |
| **iNOS** (Fairbairn, 2011) | Forward: AGAGCCTCTGGACCTCAACA  Reverse: CTCACAGCAGAGTTCCACCA | 1,94 |
| **House-keeping genes:** |  |  |
| **B2M** | Forward: AAACGGAAAGCCAAATTACC  Reverse: ATCCACAGCGTTAGGAGTGA | 1.93 |
| **HPRT** | Forward: TACCTAATCATTATGCCGAGGATT Reverse: AGCCGTTCAGTCCTGTCCAT | 1,99 |
| **TPB1** | Forward: AACAGTTCAGTAGTTATGAGCCAGA Reverse: AGATGTTCTCAAACGCTTCG | 1,96 |
| Luo et al. (2015). Veterinary Research 46(1):121. DOI 10.1186/s13567-015-0264-2.  Fairbairn et al. (2011). Doctor of Philosophy, The University of Edinburgh. Available on Research gate. | | |
